# Supplementary material for: Facile synthesis of oleylamine-capped silver nanowires and their application in transparent conductive electrodes
Source: Royal Society of Chemistry journal article supplement (doi:10.1039/c5ra13884a), 2015-01-01
Supplement: c5ra13884a1.pdf [file c5ra13884a1.pdf]

Supporting Information for

## **Facile Synthesis of Oleyamine-Capped Silver Nanowire and Its Application for Transparent Conductive Electrode\*\***

*Jun Zhu,<sup>a\*</sup> Xiufang Xu,<sup>b</sup> Jinglei Liu,<sup>c</sup> Yiqun Zheng,<sup>b</sup> and Shifeng Hou<sup>a, c</sup>*

<sup>a</sup>Research Institute of Bio-nanotechnology, Jining Medical University, Jining, Shandong 272000, P. R. China

<sup>b</sup>Leadernano Tech L.L.C., Jining, Shandong 272000, P. R. China

<sup>c</sup>National Engineering and Technology Research Center for Colloidal Materials, Shandong University, Jinan, Shandong 250100, P. R. China

\*Corresponding Author: Prof. J. Zhu, E-mail: [jnzhuj@163.com](mailto:jnzhuj@163.com)

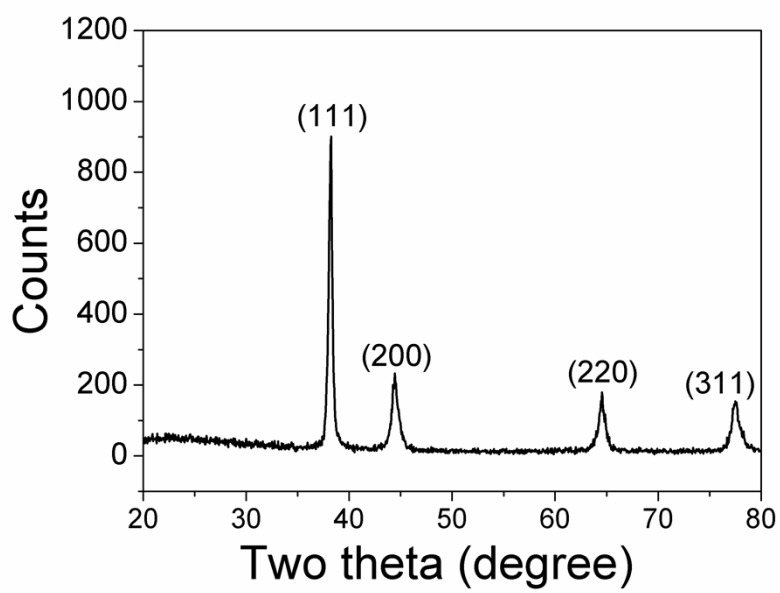

**Figure S1.** XRD pattern of Ag nanowires.

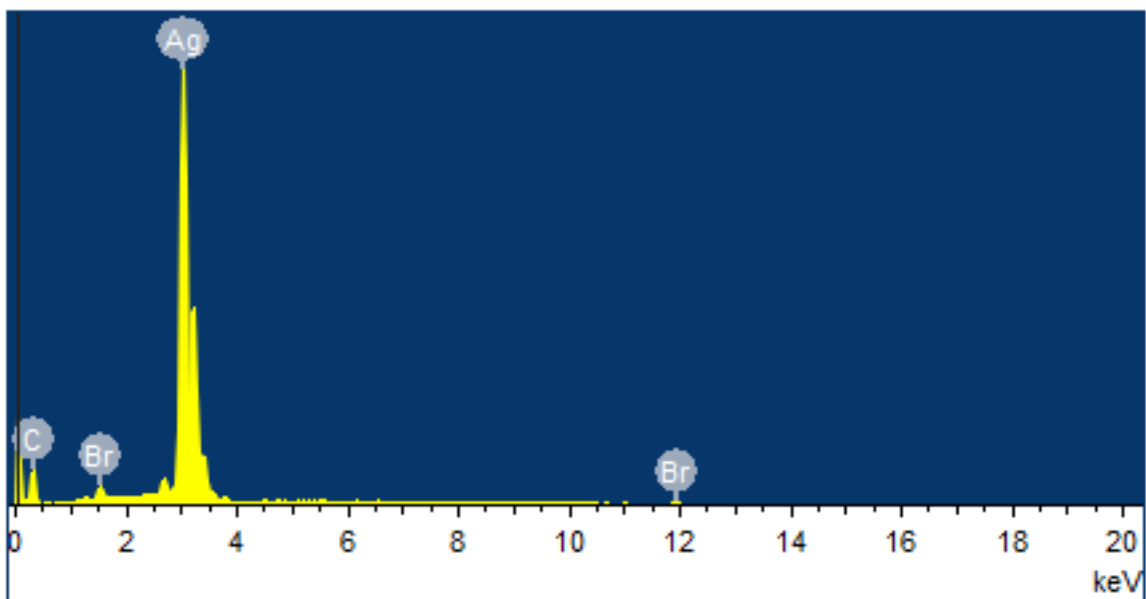

**Figure S2.** EDS pattern of Ag nanowires. Three elements, Ag, Br, and C, were observed in the spectrum and their mass percentage was 92.4%, 1.91%, and 5.70%, respectively. The presence of Br and C should be attributed to the residual Br<sup>-</sup> on Ag nanowires surface and the use of conductive carbon tape during the measurement, respectively.

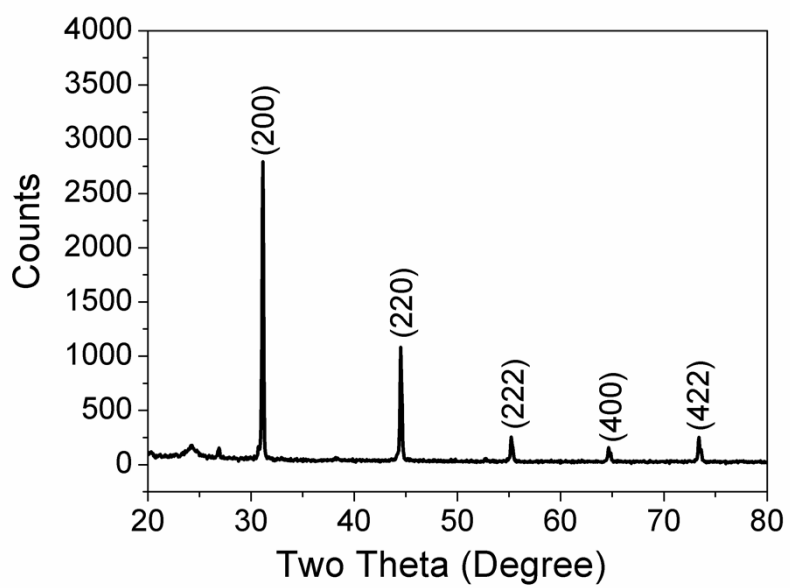

**Figure S3.** XRD pattern of an aliquot taken out from the reaction system at  $t = 1$  h.

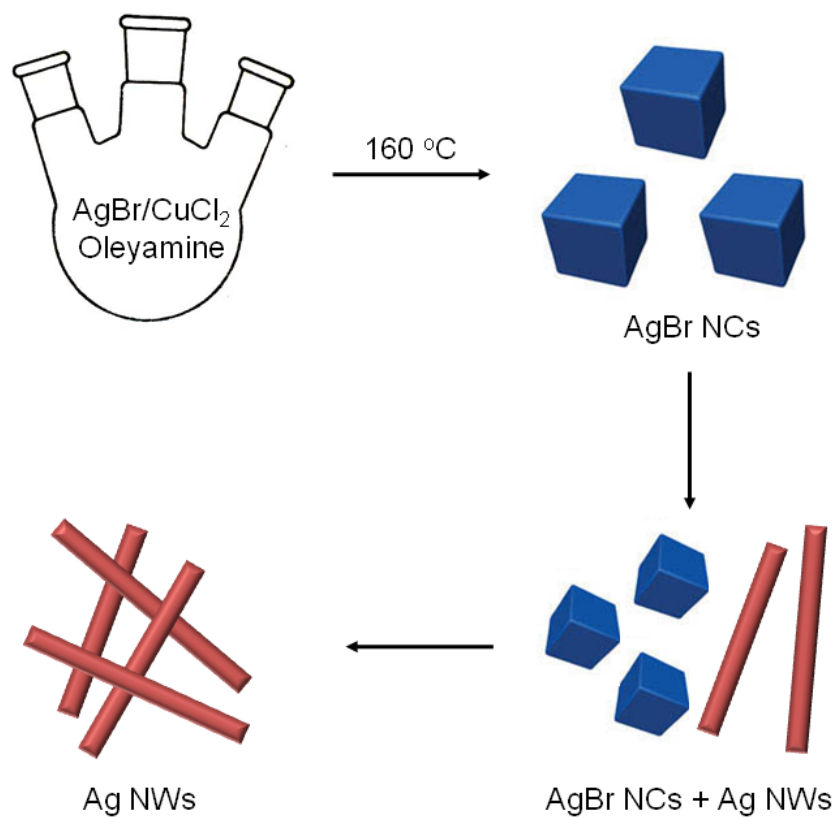

**Figure S4.** Schematic illustration showing the reactions and related mechanism leading to the formation of silver nanowire (NC: nanocube; NW: nanowire).

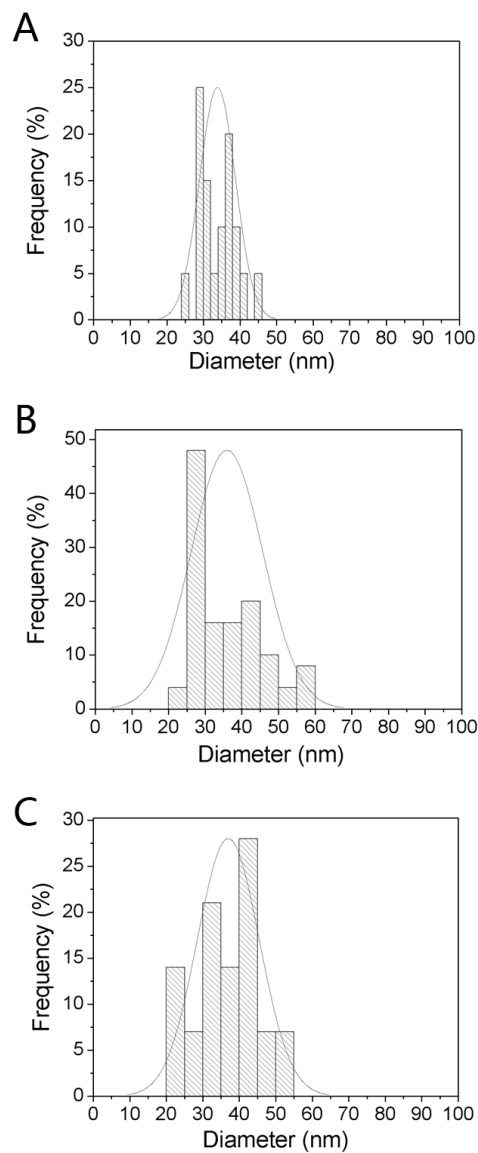

**Figure S5.** Histograms of nanowire diameter distribution for samples prepared under the experimental condition described in (A) Figure 1; (B) Figure 3C; (C) Figure 3D, respectively.

**Table S1.** Diameter of nanowires and corresponding standard deviations for samples obtained by repeating the standard procedure for three times.

|          | <b>Diameter (nm)</b> | <b>Standard deviation (%)</b> |
|----------|----------------------|-------------------------------|
| <b>1</b> | 33.8                 | 7.7                           |
| <b>2</b> | 35.1                 | 7.3                           |
| <b>3</b> | 34.3                 | 7.6                           |
